# Supplementary material for: A Novel Multiplexed, Image-Based Approach to Detect Phenotypes That Underlie Chromosome Instability in Human Cells
Source: PubMed Central journal article supplement (PMC4404342; doi:10.1371/journal.pone.0123200), 2015-04-20
Supplement: pone.0123200.s003.pdf [file pone.0123200.s003.pdf]

**S1 Table. *SMCIA* Silencing Increases Mean Nuclear Volume in J21 Cells.**

|                       | # Nuclei | Mean Nuclear Volume ( $\mu\text{m}^3$ ) | Standard Deviation | <i>p</i> -value <sup>A</sup> | <i>p</i> -value <sup>B</sup> | Fold Increase <sup>C</sup> |
|-----------------------|----------|-----------------------------------------|--------------------|------------------------------|------------------------------|----------------------------|
| <b>Untreated</b>      | 223      | 3008.1                                  | 592.6              | N/A <sup>D</sup>             | 0.4602                       | 1.0                        |
| <b>si<i>GAPDH</i></b> | 275      | 2955.9                                  | 907.7              | 0.4602                       | N/A                          | 1.0                        |
| <b>si<i>SMCIA</i></b> | 273      | 4632.6                                  | 1608.7             | <0.0001                      | <0.0001                      | 1.5                        |

<sup>A</sup>*p*-values obtained when comparing mean nuclear volumes to untreated control.

<sup>B</sup>*p*-values obtained when comparing mean nuclear volume to si*GAPDH* control.

<sup>C</sup>Fold increase values refer to the increase in mean nuclear volume relative to the untreated control.

<sup>D</sup>N/A; not applicable
