# Supplementary material for: A Novel Multiplexed, Image-Based Approach to Detect Phenotypes That Underlie Chromosome Instability in Human Cells
Source: PubMed Central journal article supplement (PMC4404342; doi:10.1371/journal.pone.0123200), 2015-04-20
Supplement: pone.0123200.s004.pdf [file pone.0123200.s004.pdf]

**S2 Table. *SMC1A* Silencing by each siRNA Increases Mean Nuclear Volume in J21 Cells.**

|                         | # Nuclei | Mean Nuclear Volume ( $\mu\text{m}^3$ ) | Standard Deviation | <i>p</i> -value  | Fold Increase <sup>A</sup> |
|-------------------------|----------|-----------------------------------------|--------------------|------------------|----------------------------|
| <b>Untreated</b>        | 207      | 3022.7                                  | 866.0              | N/A <sup>B</sup> | 1.0                        |
| <b>si<i>GAPDH</i></b>   | 191      | 3104.8                                  | 764.6              | 0.3184           | 1.0                        |
| <b>si<i>SMC1A-1</i></b> | 247      | 3292.2                                  | 1063.4             | 0.0036           | 1.1                        |
| <b>si<i>SMC1A-2</i></b> | 141      | 3412.9                                  | 1287.9             | 0.0008           | 1.1                        |
| <b>si<i>SMC1A-3</i></b> | 194      | 3991.2                                  | 1474.4             | <0.0001          | 1.3                        |
| <b>si<i>SMC1A-4</i></b> | 128      | 4828.0                                  | 1477.5             | <0.0001          | 1.6                        |

<sup>A</sup>Fold increase values refer to the increase in mean nuclear volume relative to the untreated control.

<sup>B</sup>N/A; not applicable
