# Supplementary material for: A Novel Multiplexed, Image-Based Approach to Detect Phenotypes That Underlie Chromosome Instability in Human Cells
Source: PubMed Central journal article supplement (PMC4404342; doi:10.1371/journal.pone.0123200), 2015-04-20
Supplement: pone.0123200.s006.pdf [file pone.0123200.s006.pdf]

**S4 Table. *SMC1A* Silencing Induces Chromosome Content Changes in hTERT Cells.**

| <b>Condition</b>      | <b># Spreads</b> | <b>Spreads with Abnormal Chromosome Count (%)</b> | <b><i>p</i>-value<sup>A</sup></b> | <b>Fold Increase<sup>B</sup></b> |
|-----------------------|------------------|---------------------------------------------------|-----------------------------------|----------------------------------|
| <b>Untreated</b>      | 100              | 11                                                | N/A <sup>C</sup>                  | N/A                              |
| <b>si<i>GAPDH</i></b> | 100              | 9                                                 | >0.9999                           | 0.82                             |
| <b>si<i>SMC1A</i></b> | 100              | 42                                                | 0.0112                            | 3.82                             |

<sup>A</sup>A Kolmogorov-Smirnov test was used to calculate statistical significance between chromosome number distributions from each condition and the untreated (negative) control. A *p*-value <0.05 is considered significant.

<sup>B</sup>Fold increase refers to the increase in the percentage of spreads harboring an abnormal chromosome number ( $\neq 46$ ) relative to the untreated control.

<sup>C</sup>N/A; not applicable
