# Supplementary material for: A Novel Multiplexed, Image-Based Approach to Detect Phenotypes That Underlie Chromosome Instability in Human Cells
Source: PubMed Central journal article supplement (PMC4404342; doi:10.1371/journal.pone.0123200), 2015-04-20
Supplement: pone.0123200.s007.pdf [file pone.0123200.s007.pdf]

**S5 Table. The *LacO* Cassettes are Karyotypically Stable within J21 Cells.**

| <b>Time (weeks)</b> | <b>Number of Interphase Cells Evaluated</b> | <b>Percentage of Cells with Two DsRED-LacI Foci</b> |
|---------------------|---------------------------------------------|-----------------------------------------------------|
| 0                   | 103                                         | 79.6                                                |
| 6                   | 175                                         | 78.3                                                |
